# Supplementary material for: Chitosan Oligosaccharides Suppress Nuclear Factor-Kappa B Activation and Ameliorate Experimental Autoimmune Uveoretinitis in Mice
Source: MDPI journal article supplement (doi:10.3390/ijms21218326), 2020-11-06
Supplement: s1 [file s1]

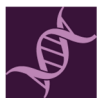

Article

# Chitosan Oligosaccharides Suppress Nuclear Factor-Kappa B Activation and Ameliorate Experimental Autoimmune Uveoretinitis in Mice

Sheng-Min Hsu <sup>1</sup>, Chang-Hao Yang <sup>2</sup>, Hsien-Yang Tsai <sup>3</sup>, Chia-Jhen Lin <sup>1</sup>, Yi-Hsuan Fang <sup>4</sup>, Chi-Chang Shieh <sup>5,\*</sup> and Shun-Hua Chen <sup>4,\*</sup>

<sup>1</sup> Department of Ophthalmology, National Cheng Kung University Hospital, College of Medicine, National Cheng Kung University, Tainan 704, Taiwan; shengmin@ncku.edu.tw (S.-M.H.); towawa1206@gmail.com (C.-J.L.)

<sup>2</sup> Department of Ophthalmology, National Taiwan University Hospital, College of Medicine, National Taiwan University, Taipei 100, Taiwan; chyangoph@ntu.edu.tw

<sup>3</sup> Department of Ophthalmology, Tzu Chi Hospital, Taichung 427, Taiwan; tc1512901@tzuchi.com.tw

<sup>4</sup> Department of Microbiology and Immunology, College of Medicine, National Cheng Kung University, Tainan 701, Taiwan; tw7629@gmail.com (Y.-H.F.); shunhua@mail.ncku.edu.tw (S.-H.C.)

<sup>5</sup> Institute of Clinical Medicine, College of Medicine, National Cheng Kung University, Tainan 704, Taiwan; cshieh@mail.ncku.edu.tw

\* Correspondence: shunhua@mail.ncku.edu.tw (S.-H.C.) or cshieh@mail.ncku.edu.tw (C.-C.S.)

## Supplementary figures

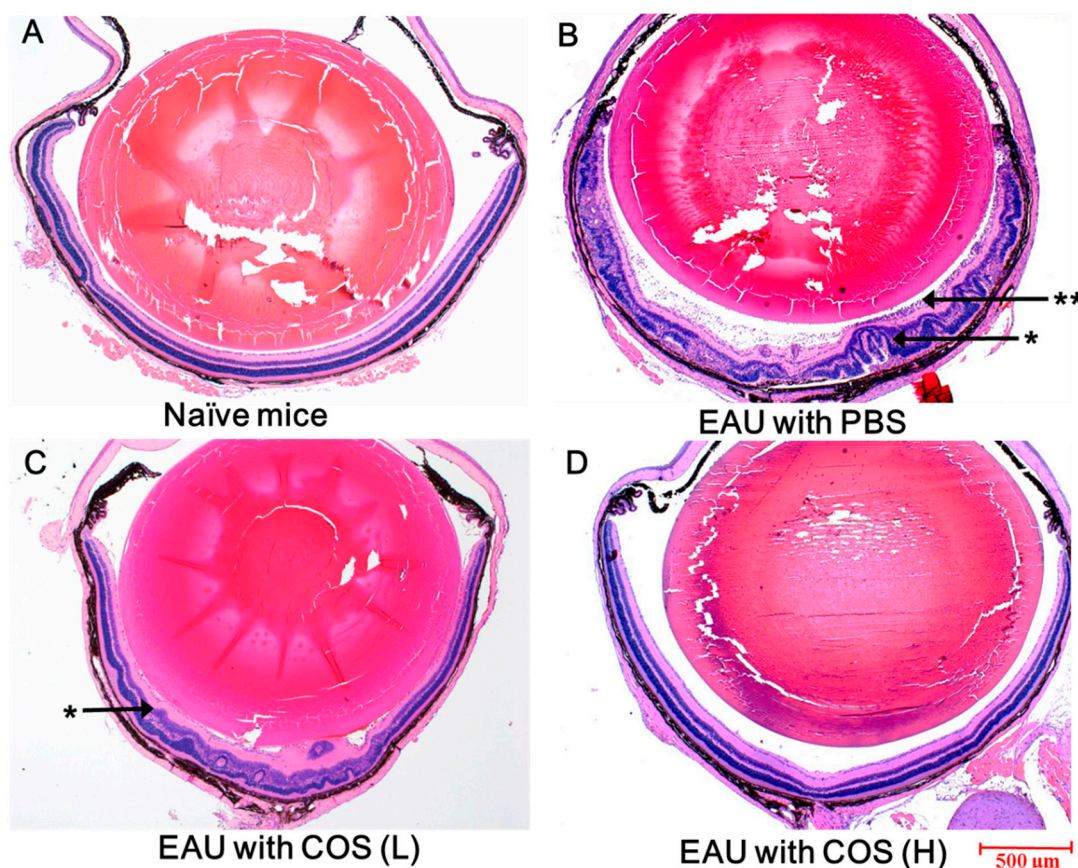

**Figure S1.** COS treatment reduces EAU severity in mice. Representative photomicrographs of H&E-stained slides of the vitreous cavity and whole retina of (A) naïve C57BL/6 mice without EAU induction, (B) EAU mice treated with PBS, (C) EAU mice treated with the low-dose (10 mg/kg) of COS, and (D) EAU mice treated with the high-dose (20 mg/kg) of COS. There were more than 100

infiltrative cells in the vitreous cavity of EAU mice treated with PBS (B), but less than 5 infiltrative cells in the vitreous cavity of EAU mice treated with the high-dose of COS (D). \* indicates retinal folds on the retinas; \*\* indicates infiltrative cells in the vitreous cavity. Images are the representative results of at least four samples per group from two independent experiments.

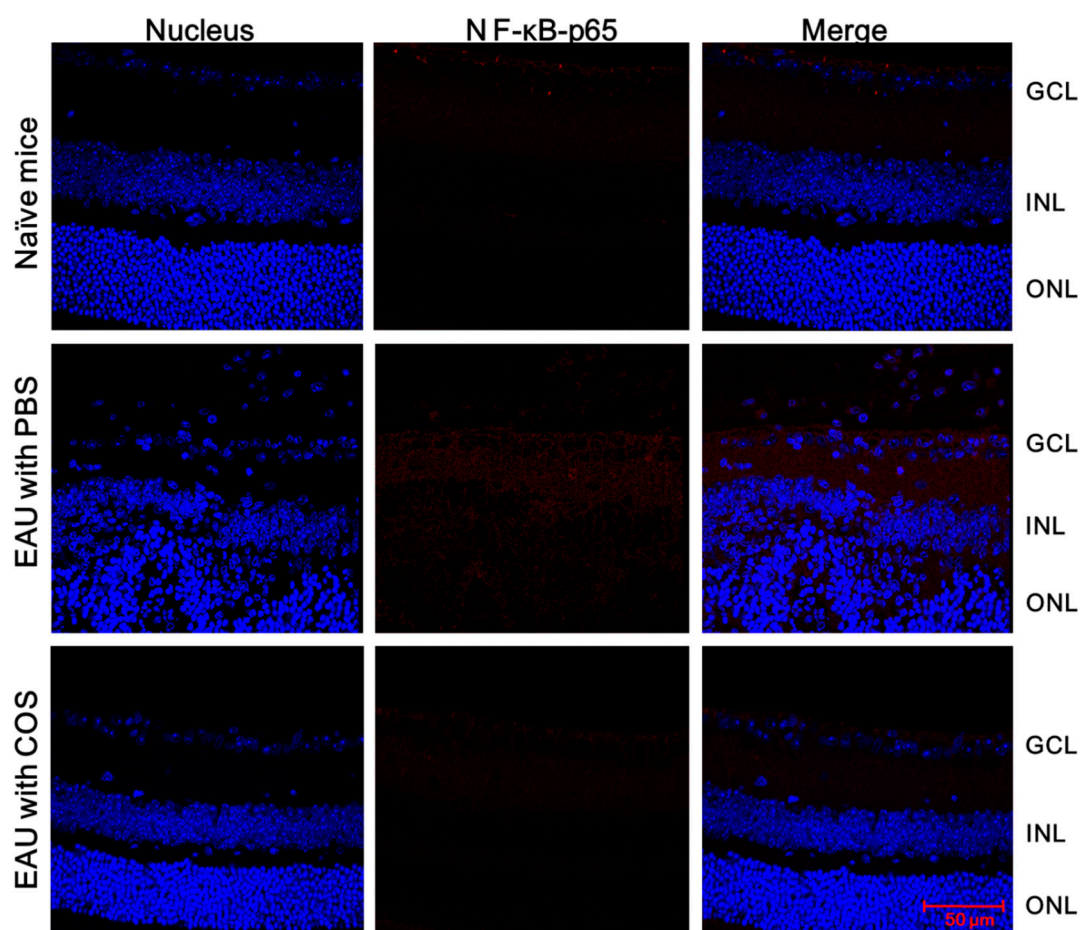

**Figure S2.** COS treatment reduces the nuclear translocation of NF-κB subunit, p65 in the retinas of mice with EAU induction. Eyes of mice without EAU induction (naïve) or with EAU induction were treated with PBS or COS (20 mg/kg) and monitored by immunofluorescence staining for NF-κB (p65) with antibody and for nuclei with DAPI. NF-κB (p65) was detected abundantly in the ganglion cell layer (GCL) of the retina of EAU mice treated with PBS. Images are representative of > 4 samples per group from two independent experiments. INL, inner nuclear layer and ONL, out nuclear layer.
